# Supplementary material
Source: publisher site journal article supplement (https://www.dovepress.com/get_supplementary_file.php?f=478328.docx)
Supplement: Supplementary file 1 [file get_supplementary_file.php]

**
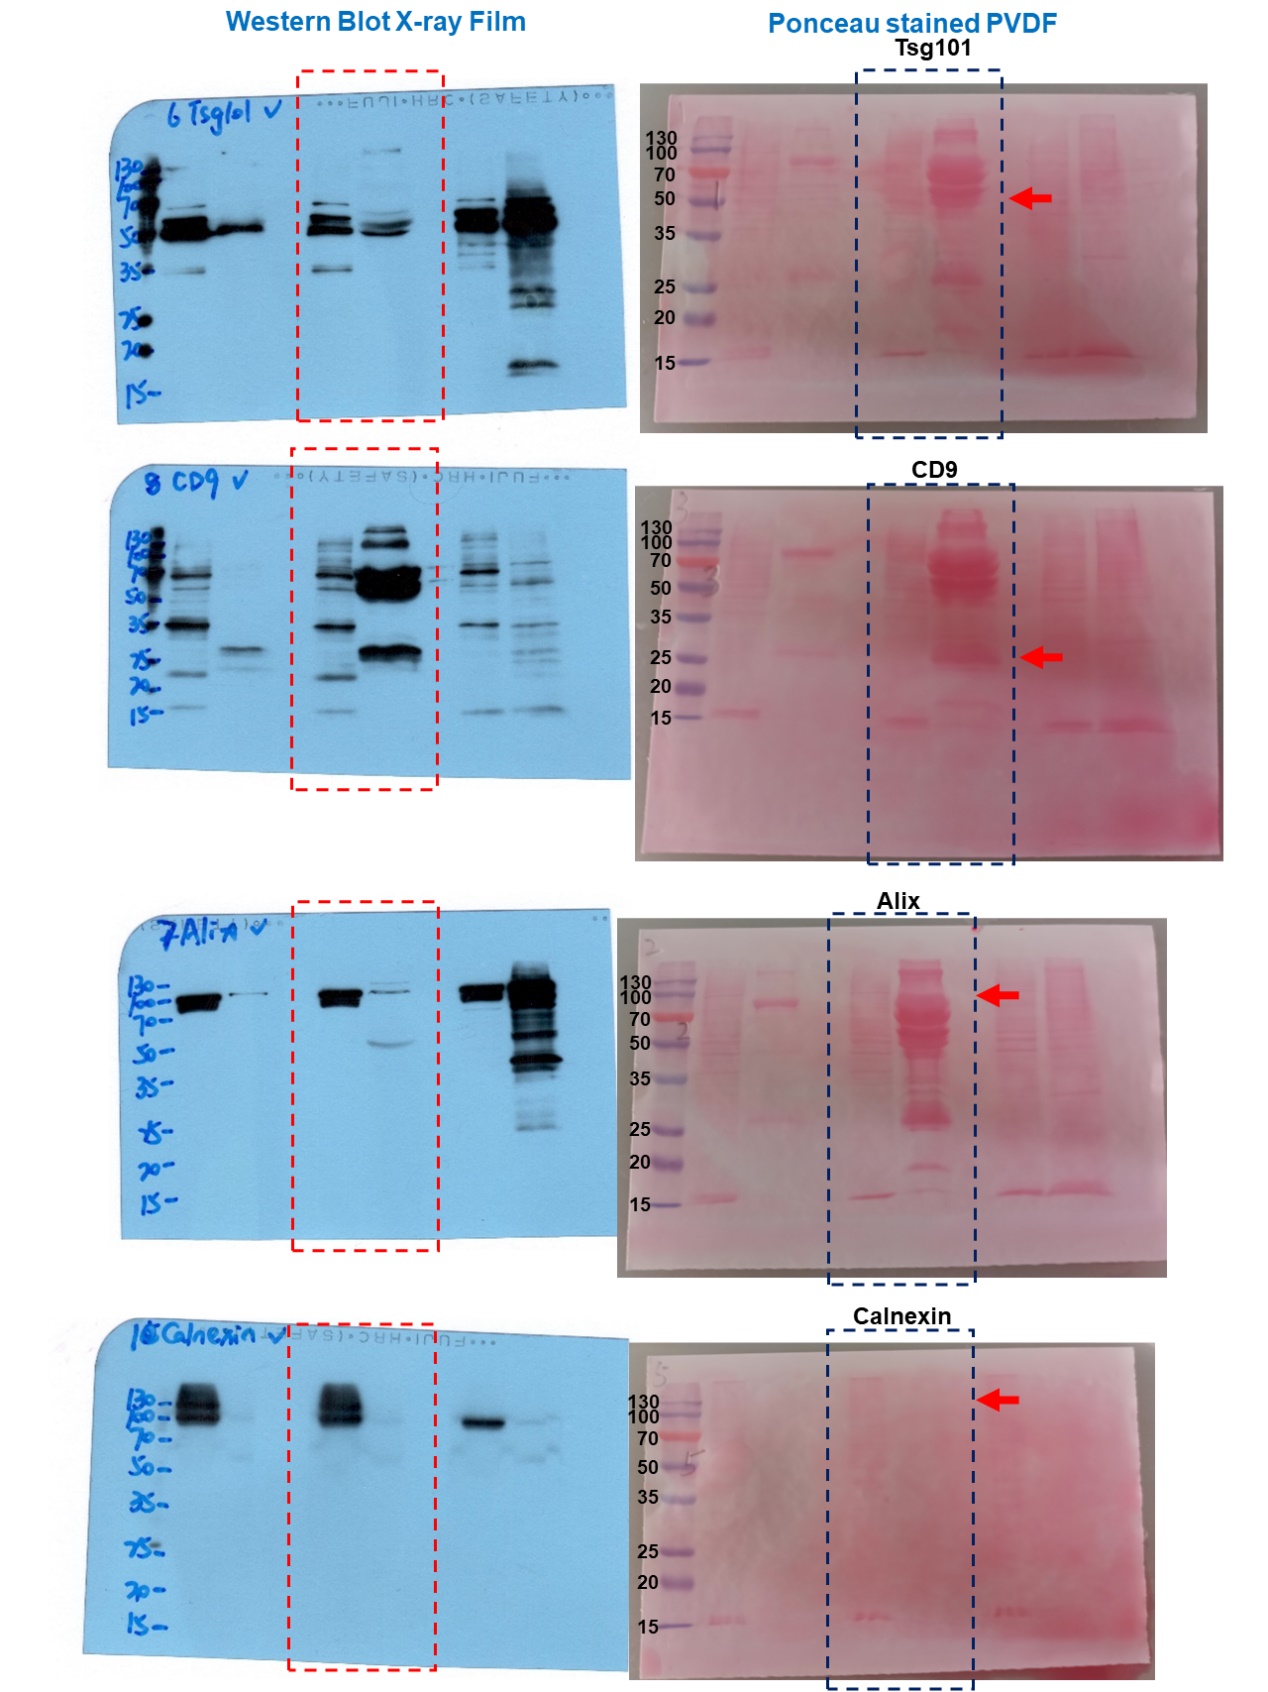
Supplementary Figure**

**Supplementary Figure1.** The original film exposure results and Ponceau stained PVDF membrane of Figure 4C.

**
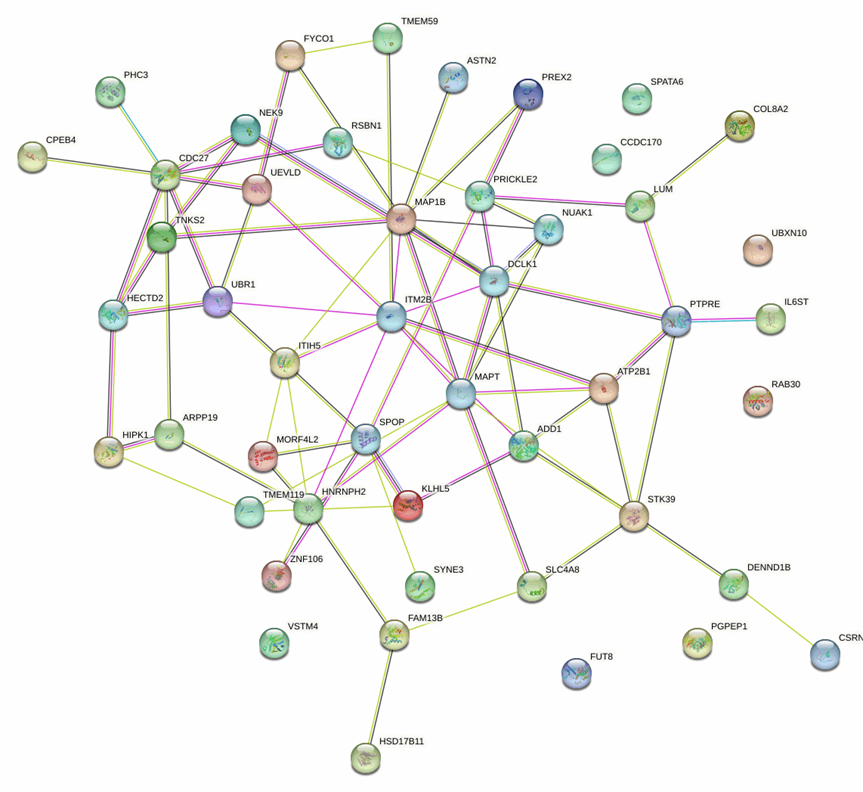
**

**Supplementary Figure2.** PPI network composed of 48 potential target genes related to BC prognosis.
